# Supplementary material for: Increased ratio of galactolipid MGDG : DGDG induces jasmonic acid overproduction and changes chloroplast shape
Source: PubMed Central journal article supplement — New Phytol. 2020 Jul 21;228(4):1327–35. doi: 10.1111/nph.16766 (PMC7689733; doi:10.1111/nph.16766), 2020-07-21
Supplement: NPH-228-1327-s001.pdf [file NPH-228-1327-s001.pdf]

## **New Phytologist Supporting Information**

Article title: **Increased ratio of galactolipids MGDG:DGDG induces jasmonic acid overproduction and changes chloroplast shape**

Authors: Chun-Wei Yu, Yang-Tsung Lin, and Hsou-min Li

Article acceptance date: 14 June 2020

The following Supporting Information is available for this article:

Figure S1. The C1 and d4 *amiR-MGD1* transgenic lines did not show great reduction in chloroplast numbers.

Figure S2. Chlorophyll comparison based on dry weights.

Table S1 The amounts of major chloroplast lipids in the wild type and various mutants.

Table S2 Primers used for quantitative RT-PCR.

**Figure S1. The C1 and d4 *amiR-MGD1* transgenic lines did not show great reduction in chloroplast numbers.** Plants were grown on 10  $\mu$ M DEX-MS medium for 15 days, and leaf 1 or leaf 2 were excised and embedded in 5% agarose. Then, 100- $\mu$ m-thick sections were used to observed chlorophyll fluorescence of mesophyll cells. Chl, chlorophyll fluorescence; DIC, differential interference contrast images.

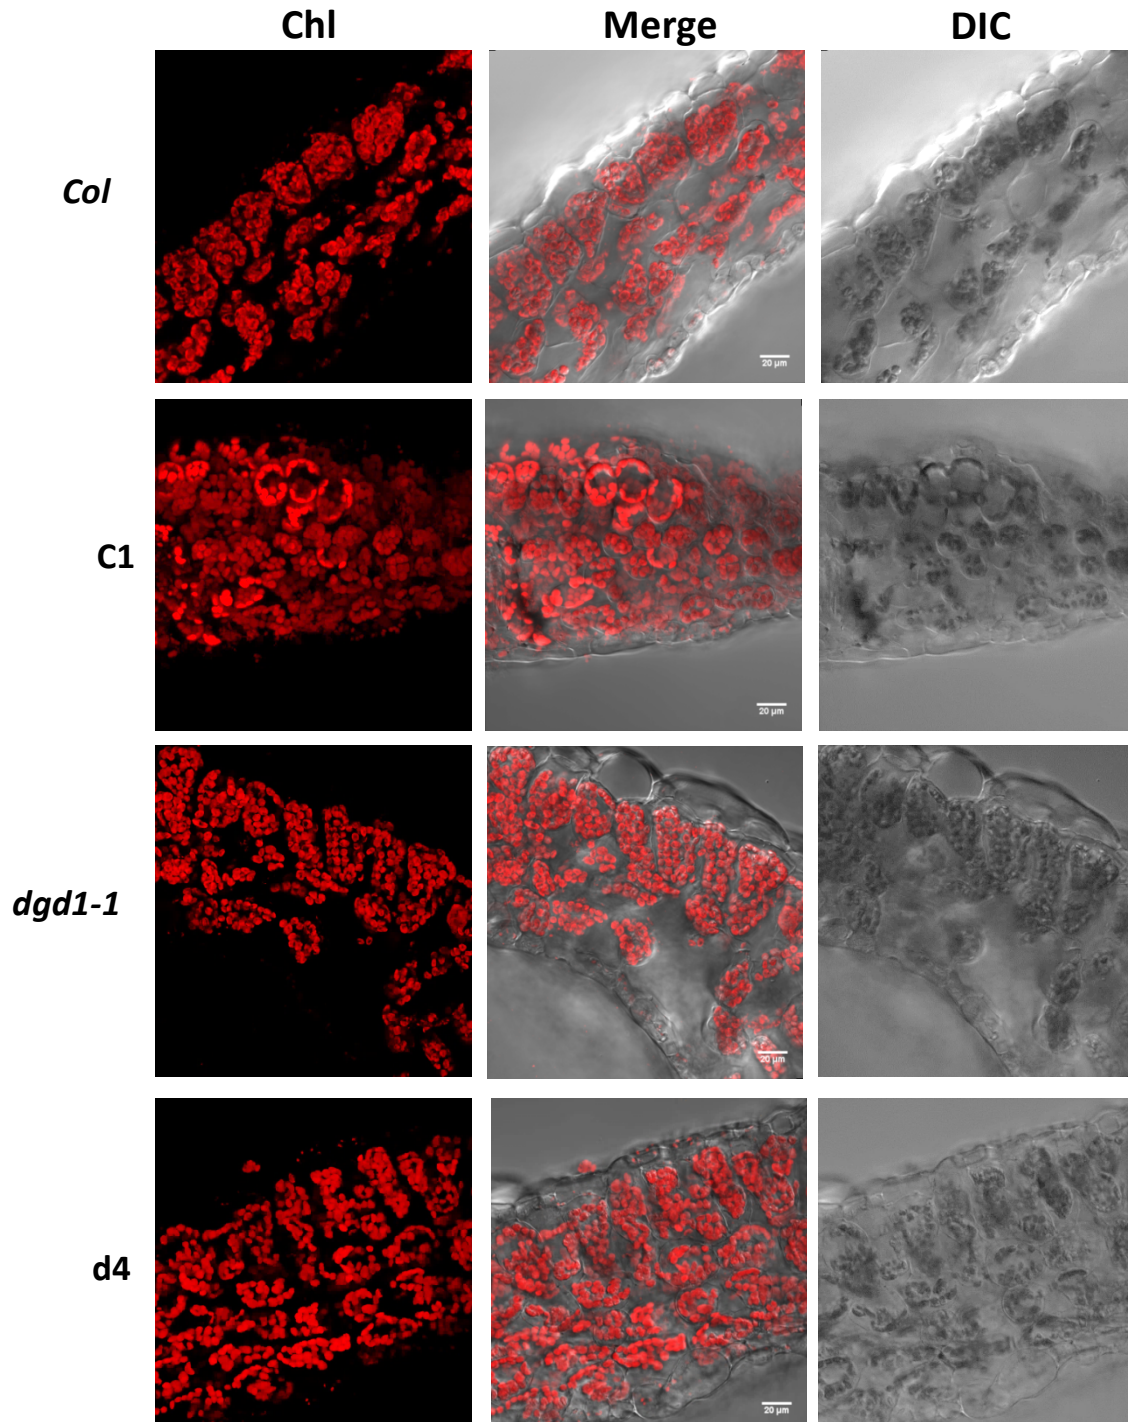

**Figure S2. Chlorophyll comparison based on dry weights.** Plants were grown on 10  $\mu$ M DEX-MS medium for 15 days, and leaves were then harvested for chlorophyll determination and normalized by dry weight (DW). Values are means  $\pm$ SD of three biological repeats. Values marked with different letters indicate a statistically significant difference between genotypes ( $p < 0.05$ , one-way ANOVA with Tukey honestly significant difference [HSD] test).

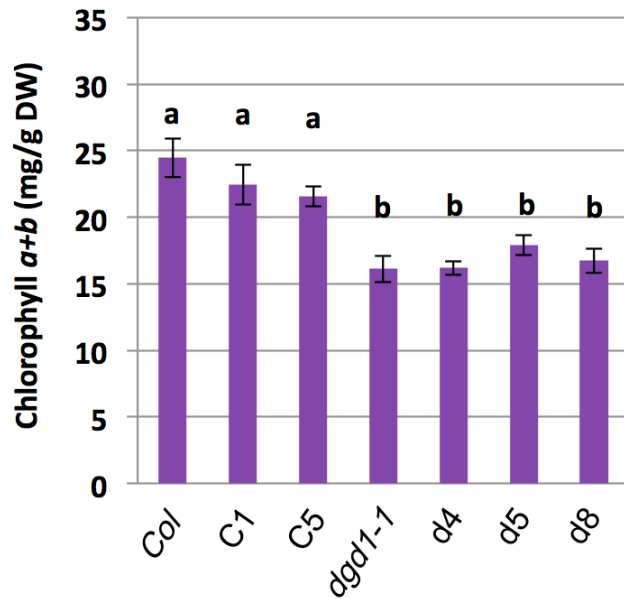

**Table S1. The amount of major chloroplast lipids in the wild type and various mutants.**

Means  $\pm$  SD of at least four independent plant batches are shown. Values are nmol mg<sup>-1</sup> dry weight. MGDG, monogalactosyl diacylglycerol; DGDG, digalactosyl diacylglycerol; SQDG, sulfoquinovosyl diacylglycerol; PG, phosphatidylglycerol.

| <b>Plant</b>  | <b>MGDG</b>    | <b>DGDG</b>    | <b>PG</b>      | <b>SQDG</b>   |
|---------------|----------------|----------------|----------------|---------------|
| <i>Col</i>    | 57.1 $\pm$ 5.7 | 22.2 $\pm$ 0.7 | 11.7 $\pm$ 1.6 | 5.0 $\pm$ 0.4 |
| C1            | 43.8 $\pm$ 8.9 | 18.3 $\pm$ 3.2 | 10.6 $\pm$ 1.3 | 3.5 $\pm$ 0.6 |
| <i>dgd1-1</i> | 45.7 $\pm$ 7.4 | 1.4 $\pm$ 0.4  | 14.4 $\pm$ 2.0 | 3.3 $\pm$ 0.7 |
| d4            | 34.8 $\pm$ 7.0 | 1.4 $\pm$ 0.4  | 12.3 $\pm$ 2.3 | 3.2 $\pm$ 0.3 |

**Table S2 Primers used for quantitative RT-PCR**

| <b>Gene name</b> | <b>AGI Locus code</b> | <b>Primer sequence</b> |                          |
|------------------|-----------------------|------------------------|--------------------------|
| <i>UBQ10</i>     | AT4G05320             | Fw                     | TCCGGATCAGCAGAGGCTTA     |
|                  |                       | Rv                     | TCAGAACTCTCCACCTCAAG     |
| <i>MGD1</i>      | AT4G31780             | Fw                     | GCAGGACTTGAAACATCACAAATC |
|                  |                       | Rv                     | GCGAACTGGTTTCACAAAGGA    |
| <i>AOS</i>       | AT5G42650             | Fw                     | CACCGGCGTTAGTCAAATCT     |
|                  |                       | Rv                     | CCGGCGGATTCTAAGAAAA      |
| <i>AOC1</i>      | AT3G25760             | Fw                     | AACTCCGGTACCACCGTCTA     |
|                  |                       | Rv                     | GGCTTAAGCGCCTTAGCTTC     |
| <i>LOX2</i>      | AT3G45140             | Fw                     | GCCATTGAGTTGACTTGTC      |
|                  |                       | Rv                     | CACTTAGTTGTCTATTTGCCGC   |
| <i>LOX3</i>      | AT1G17420             | Fw                     | TCCCTGCCGATCTAA          |
|                  |                       | Rv                     | GTTTGGGACGTAGCCA         |
| <i>LOX4</i>      | AT1G72520             | Fw                     | GCTTGCTTAGATACGACACT     |
|                  |                       | Rv                     | ATGTGGTCTTCCGTGAGAGC     |
| <i>PDF1.2</i>    | AT5G44420             | Fw                     | TGTTCTCTTTGCTGCTTTGACGC  |
|                  |                       | Rv                     | TGTGTGCTGGGAAGACATAGTTGC |
| <i>VSP1</i>      | AT5G24780             | Fw                     | GGGCGTACTGGTCGTGGTTA     |
|                  |                       | Rv                     | TCCCGAGTTCCAAGAGGTTTT    |
